# Supplementary material for: Clinical and Laboratory Response of Domiciled Dogs with Visceral Leishmaniasis Treated with Miltefosine and Allopurinol
Source: MDPI journal article supplement (doi:10.3390/tropicalmed8100472), 2023-10-10
Supplement: s1 [file s1]

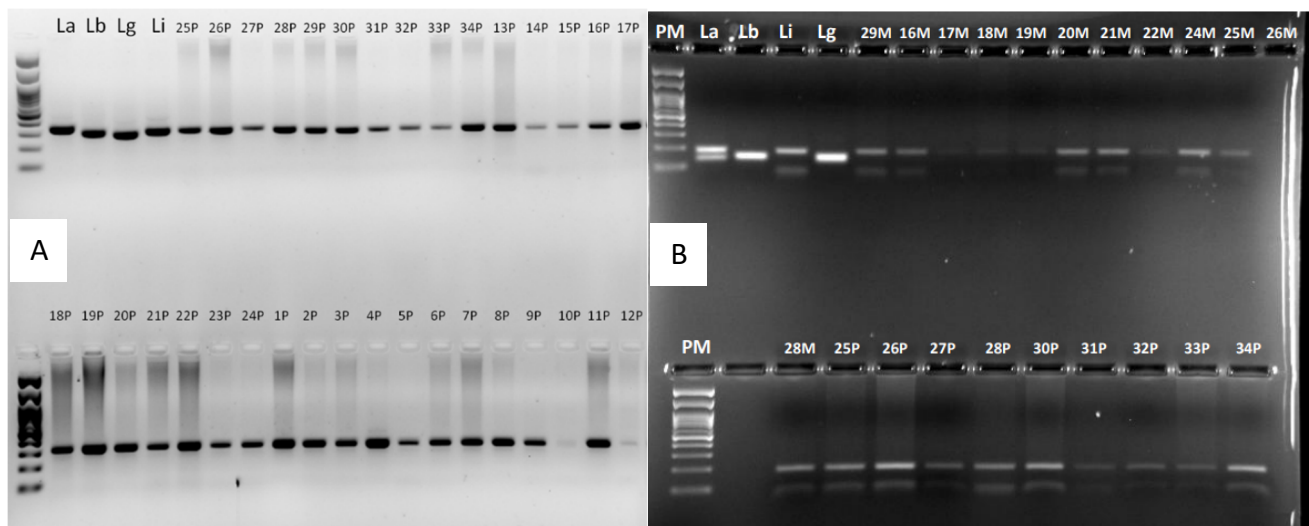

Figure S1: (A) Results of the PCR-ITS1 to verify the presence of *Leishmania* spp. in skin samples collected before treatment. (B) Results of the RFLP-ITS1 to verify *Leishmania infantum* parasitism in skin and bone marrow samples collected before treatment.
