# Supplementary material for: Clinical and Laboratory Response of Domiciled Dogs with Visceral Leishmaniasis Treated with Miltefosine and Allopurinol
Source: Trop Med Infect Dis. 2023 Oct 10;8(10):472. doi: 10.3390/tropicalmed8100472 (PMC10610677; doi:10.3390/tropicalmed8100472)
Supplement: Supplementary file 1 [file tropicalmed-08-00472-s001.zip › tropicalmed-2610127 - Supplementary Materials Table S1.xlsx]

## Sheet: Biochemical G1
G1		CREATININE					UREA					TOTAL PROTEINS					ALBUMIN					GLOBULIN
Nº	Name of dog	0	3 M	6 M	9 M	12 M	0	3 M	6 M	9 M	12 M	0	3 M	6 M	9 M	12 M	0	3 M	6 M	9 M	12 M	0	3 M	6 M	9 M	12 M
2	Roma	1	0.96	0.65	0.65	1.4	24	27	42	22	17	7.8	8.7	9.3	9	10.9	1.8	3	1.9	1.9	2.6	6	5.7	7.4	7.1	8.3
8	Jojó	1.1	0.85	0.8	1	1.24	26	30	20	39	55	8.2	7.9	9.6	10	9.8	1.7	2.7	1.7	2.6	2.3	6.5	5.2	7.9	7.4	7.5
9	Lulu	0.9	0.74	0.98	0.68	1.18	41	22	27	30	45	9.1	8	9.5	8.5	9.8	2.2	2.8	1.6	2	2.3	6.9	5.2	7.9	6.5	7.5
13	Neguinha	0.83	0.59	0.75	0.75	OB	36	33	34	29	OB	6.2	5.9	7.9	8.8	OB	2	2	2	3.2	OB	4.2	3.9	5.9	5.6	OB
14	Nega	0.85	0.71	0.66	OB		37	36	22	OB		8.7	8.2	8	OB		1.4	2	1.8	OB		7.3	6.2	6.2	OB
15	Belinha	0.74	2.73	0.61	0.51	1.1	40	253	34	43	78	8.8	8.4	7.8	7.6	7.7	2.2	3	1.4	1.9	2.2	6.6	5.4	6.4	5.7	5.5
16	Branquinha	0.91	0.7	0.71	0.79	1.16	70	23	22	42	41	9.2	8.6	8.9	8.7	7.8	1.8	2.2	1.5	1.8	1.8	7.4	6.4	7.4	6.9	6
18	Zeus	0.81	0.77	0.58	0.91	1.2	34	28	21	34	19	7.2	7.4	7.7	9.3	8.5	1.4	2.7	2.4	2.2	2.4	5.8	4.7	5.3	7.1	6.1
20	Nike	1.15	NA	1	0.98	1.14	45	NA	39	50	35	10.4	NA	10.4	8.4	8	2.6	NA	2.2	2	1.5	7.8	NA	8.2	6.4	6.5
21	Catuaba	1.06	OB				27	OB				6.6	OB				1.7	OB				4.9	OB
22	Magali	0.75	0.6	0.88	0.75	0.96	40	30	40	39	27	7.9	8	9	10.4	10.6	2.6	3	1.6	2.1	2.5	5.3	5	7.4	8.3	8.1
23	Luana	0.71	OB				21	OB				6.6	OB				2.7	OB				3.9	OB
24	Melissa	0.95	0.89	0.73	0.74	1.32	44	28	31	60	38	9.7	9	10	10.5	9.7	2.1	3.2	2.7	2.3	2.4	7.6	5.8	7.3	8.2	7.3
26	Spaik	0.92	OB				30	OB				9.7	OB				1.5	OB				8.2	OB
30	Berrante	0.8	0.68	0.73	0.67	1.29	32	44	45	38	98	7.4	8.1	7.7	10.3	8.5	2.1	2.9	1.8	2.2	2.2	5.3	5.2	5.9	8.1	6.3
NA	not assessment
OB	death
0	After treatment beginning
3 M	3 months after treatment beginning
6 M	6 months after treatment beginning
9 M	9 months after treatment beginning
12 M	12 months after treatment beginning

## Sheet: Biochemical G2
G2		CREATININE					UREA					TOTAL PROTEINS					ALBUMIN					GLOBULIN
Nº	Name of dog	0	3 M	6 M	9 M	12 M	0	3 M	6 M	9 M	12 M	0	3 M	6 M	9 M	12 M	0	3 M	6 M	9 M	12 M	0	3 M	6 M	9 M	12 M
1	Snoop	0.84	0.77	1.1	1.23	1.76	58	36	49	30	61	8.8	8.3	9.8	9.8	8.7	1	3.1	2	2.4	2.5	7.8	5.2	7.8	7.4	6.2
3	Pitchula	0.72	1.25	0.7	0.9	1.25	20	44	44	39	24	8.1	7.8	8.1	9.6	9.4	2.5	4	3.1	3.5	3.1	5.6	3.8	5	6.1	6.3
5	Pretinha	0.85	1.2	0.74	1.51	1.27	27	36	33	19	42	9.9	8.9	10.4	10.8	11.9	1.7	3.2	2.6	4	1.8	8.2	5.7	7.8	6.8	10.1
6	Suzi	1.01	1.11	1	1.25	1.56	20	43	36	22	37	7.4	7.1	5.5	9	8.3	2.5	3.8	3.5	3.8	3.3	4.9	3.3	2	5.2	5
7	Dafine	0.63	0.61	0.61	0.75	1.27	32	28	42	36	67	8.9	8.3	7.9	9.9	9.5	2	2.6	1.9	2	2.6	6.9	5.7	6	7.9	6.9
10	Fiote	0.82	0.8	0.93	1.12	OB	20	32	30	33	OB	9.1	7.8	8.5	7.7	OB	2.2	4.4	2	1.6	OB	6.9	3.4	6.5	6.1	OB
12	Cacau	1.02	1.07	0.89	0.68	1.58	37	33	42	28	74	7.1	7.3	6.8	8.5	8.3	3.1	3.5	2.2	3.3	3.4	4	3.8	4.6	5.2	4.9
17	Nely	0.65	0.76	0.98	0.6	1.18	26	42	34	22	55	9.8	7.9	9.1	8.5	9.6	1.9	2.9	2.8	2.8	2.7	7.9	5	6.3	5.7	6.9
19	Dóres	0.74	0.59	OB			24	37	OB			8.7	8.1	OB			1.6	3.5	OB			7.1	4.6	OB
25	Marley	1.08	0.95	0.99	1.05	1.96	39	19	38	27	55	8.6	6.8	6.9	6.6	7	1.6	4.2	2.9	3.7	3.2	7	2.6	4	2.9	3.8
29	Aruk	0.96	OB				37	OB				9.6	OB				2	OB				7.6	OB
31	Lola	1.21	OB				29	OB				6.1	OB				1.7	OB				4.4	OB
32	Tigresa	0.92	0.66	0.73	0.77	0.89	28	23	27	20	51	6.7	6.3	8.1	7.1	3.8	2	2	1.3	1.7	1.3	4.7	4.3	6.8	5.4	2.5
34	Sarnento	0.95	0.7	0.96	1.69	1.59	50	20	38	42	97	9.2	7.9	7.3	9.2	9.7	1.7	2	1.7	2.4	1.8	7.5	5.9	5.6	6.8	7.9
NA	not assessment
OB	death
0	After treatment beginning
3 M	3 months after treatment beginning
6 M	6 months after treatment beginning
9 M	9 months after treatment beginning
12 M	12 months after treatment beginning

## Sheet: Blood count G1
G1		0			3 M			6 M			9 M			12 M
Nº	Name of dog	Hemácias	Leucócitos	Plaquetas	Hemácias	Leucócitos	Plaquetas	Hemácias	Leucócitos	Plaquetas	Hemácias	Leucócitos	Plaquetas	Hemácias	Leucócitos	Plaquetas
2	Roma	ok	ok	thrombocytopenia	anemia	ok	ok	ok	ok	ok	ok	ok	thrombocytopenia	anemia	ok	thrombocytopenia
8	Jojó	anemia	ok	ok	ok	ok	thrombocytopenia	ok	ok	ok	ok	ok	thrombocytopenia	anemia	leukopenia	ok
9	Lulu	ok	ok	thrombocytopenia	anemia	ok	thrombocytopenia	ok	ok	ok	anemia	ok	ok	anemia	ok	ok
13	Neguinha	ok	ok	ok	anemia	leukocytosis	ok	ok	ok	ok	ok	ok	thrombocytopenia	OB
14	Nega	anemia	leukopenia	thrombocytopenia	anemia	leukopenia	ok	anemia	leukopenia	thrombocytopenia	OB
15	Belinha	anemia	leukocytosis	thrombocytopenia	anemia	leukopenia	ok	anemia	ok	ok	ok	ok	thrombocytopenia	anemia	ok	ok
16	Branquinha	anemia	leukopenia	thrombocytopenia	ok	leukopenia	thrombocytopenia	anemia	leukopenia	ok	anemia	ok	ok	anemia	leukopenia	thrombocytopenia
18	Zeus	anemia	ok	thrombocytopenia	ok	ok	ok	anemia	ok	ok	anemia	ok	thrombocytopenia	anemia	ok	thrombocytopenia
20	Nike	ok	leukocytosis	ok	NA	NA	NA	ok	ok	ok	anemia	leukopenia	thrombocytopenia	anemia	ok	ok
21	Catuaba	anemia	ok	thrombocytopenia	OB
22	Magali	ok	ok	ok	ok	ok	ok	anemia	ok	ok	anemia	ok	ok	anemia	leukopenia	ok
23	Luana	ok	leukopenia	ok	OB
24	Melissa	anemia	ok	thrombocytopenia	ok	ok	ok	ok	ok	ok	ok	ok	thrombocytopenia	anemia	ok	ok
26	Spaik	anemia	ok	ok	OB
30	Berrante	anemia	leukocytosis	thrombocytopenia	anemia	leukocytosis	thrombocytopenia	anemia	ok	ok	anemia	leukocytosis	thrombocytopenia	anemia	ok	ok
NA	not assessment
OB	death
0	After treatment beginning
3 M	3 months after treatment beginning
6 M	6 months after treatment beginning
9 M	9 months after treatment beginning
12 M	12 months after treatment beginning

## Sheet: Blood count G2
G2		0			3 M			6 M			9 M			12 M
Nº	Name of dog	Red cells	Leukocytes	Platelets	Red cells	Leukocytes	Platelets	Red cells	Leukocytes	Platelets	Red cells	Leukocytes	Platelets	Red cells	Leukocytes	Platelets
1	Snoop	anemia	leukopenia	thrombocytopenia	anemia	ok	ok	anemia	ok	ok	ok	ok	ok	ok	ok	ok
3	Pitchula	ok	ok	thrombocytopenia	ok	ok	ok	ok	ok	ok	ok	ok	ok	ok	ok	thrombocytopenia
5	Pretinha	anemia	ok	thrombocytopenia	ok	ok	ok	ok	leukopenia	ok	ok	leukopenia	ok	anemia	leukopenia	ok
6	Suzi	ok	ok	ok	ok	ok	ok	ok	ok	ok	ok	leukocytosis	thrombocytopenia	ok	ok	ok
7	Dafine	ok	ok	thrombocytopenia	ok	ok	ok	ok	ok	ok	ok	leukopenia	ok	anemia	ok	ok
10	Fiote	ok	ok	ok	anemia	leukocytosis	ok	ok	ok	ok	anemia	ok	thrombocytopenia	OB
12	Cacau	ok	ok	ok	ok	leukocytosis	ok	ok	ok	ok	ok	ok	ok	ok	ok	ok
17	Nely	ok	ok	ok	ok	ok	ok	ok	ok	ok	anemia	ok	thrombocytopenia	anemia	ok	ok
19	Dóres	anemia	ok	thrombocytopenia	anemia	ok	thrombocytopenia	OB
25	Marley	anemia	ok	ok	ok	ok	ok	ok	ok	ok	ok	leukocytosis	thrombocytopenia	ok	ok	ok
29	Aruk	anemia	leukocytosis	ok	OB
31	Lola	anemia	ok	thrombocytopenia	OB
32	Tigresa	anemia	leukocytosis	ok	ok	ok	ok	anemia	ok	thrombocytopenia	anemia	ok	ok	anemia	ok	ok
34	Sarnento	anemia	ok	ok	anemia	ok	ok	anemia	ok	ok	anemia	ok	thrombocytopenia	anemia	ok	thrombocytopenia
NA	not assessment
OB	death
0	After treatment beginning
3 M	3 months after treatment beginning
6 M	6 months after treatment beginning
9 M	9 months after treatment beginning
12 M	12 months after treatment beginning
