# Supplementary material for: Clinical and Laboratory Response of Domiciled Dogs with Visceral Leishmaniasis Treated with Miltefosine and Allopurinol
Source: Trop Med Infect Dis. 2023 Oct 10;8(10):472. doi: 10.3390/tropicalmed8100472 (PMC10610677; doi:10.3390/tropicalmed8100472)
Supplement: Supplementary file 1 [file tropicalmed-08-00472-s001.zip › tropicalmed-2610127 - Supplementary Materials Table S2.xlsx]

## Sheet: IIFA G1
G1		IIFA
Nº	Name of dog	0	3 M	6 M	9 M	12 M
2	Roma	1/320	1/320	1/160	1/320	1/320
8	Jojó	1/320	1/160	1/160	1/320	1/320
9	Lulu	1/320	1/320	1/320	1/320	1/320
13	Neguinha	1/320	1/320	1/80	1/320	OB
14	Nega	1/80	1/160	1/160	OB
15	Belinha	1/160	1/320	1/160	1/320	1/160
16	Branquinha	1/320	1/320	1/80	1/320	1/320
18	Zeus	1/320	1/320	1/320	1/320	1/320
20	Nike	1/320	NA	1/160	1/320	1/320
21	Catuaba	1/320	OB
22	Magali	1/320	1/320	1/320	1/320	1/320
23	Luana	1/80	OB
24	Melissa	1/320	1/320	1/160	1/320	1/320
26	Spaik	1/160	OB
30	Berrante	1/320	1/80	1/40	1/80	1/40
NA	not assessment
OB	death
0	After treatment beginning
3 M	3 months after treatment beginning
6 M	6 months after treatment beginning
9 M	9 months after treatment beginning
12 M	12 months after treatment beginning

## Sheet: IIFA G2
G2		IIFA
Nº	Name of dog	0	3 M	6 M	9 M	12 M
1	Snoop	1/320	1/320	1/320	1/80	1/80
3	Pitchula	1/80	1/80	1/40	1/320	1/80
5	Pretinha	1/320	1/320	1/320	1/320	1/160
6	Suzi	1/80	1/40	1/80	1/80	1/40
7	Dafine	1/40	1/80	1/40	1/80	1/80
10	Fiote	1/320	1/160	1/160	1/320	OB
12	Cacau	1/40	1/40	1/40	1/80	1/160
17	Nely	1/320	1/320	1/40	1/160	1/320
19	Dóres	1/320	1/320	OB
25	Marley	1/160	1/160	1/40	1/320	1/320
29	Aruk	1/320	OB
31	Lola	1/160	OB
32	Tigresa	1/320	1/320	1/160	1/320	1/320
34	Sarnento	1/80	1/320	1/320	1/160	1/160
NA	not assessment
OB	death
0	After treatment beginning
3 M	3 months after treatment beginning
6 M	6 months after treatment beginning
9 M	9 months after treatment beginning
12 M	12 months after treatment beginning
